# Supplementary material for: Metal–organic framework derived Co3S4 nanosheets grown on Ti mesh: an efficient electrocatalyst for electrochemical sensing of hydrazine
Source: Royal Society of Chemistry journal article supplement (doi:10.1039/d3nj01482g), 2023-01-01
Supplement: d3nj01482g1.pdf [file d3nj01482g1.pdf]

# Metal–organic framework derived $\text{Co}_3\text{S}_4$ nanosheets grown on Ti mesh: an efficient electrocatalyst for electrochemical sensing of hydrazine

Jiankang Wang, Rui Li, Rong Li, Taiping Xie, Songli Liu, Yajing Wang\*

College of Materials Science and Engineering, Yangtze Normal University, Chongqing 408100, China E-mail: yajing.0816@163.com

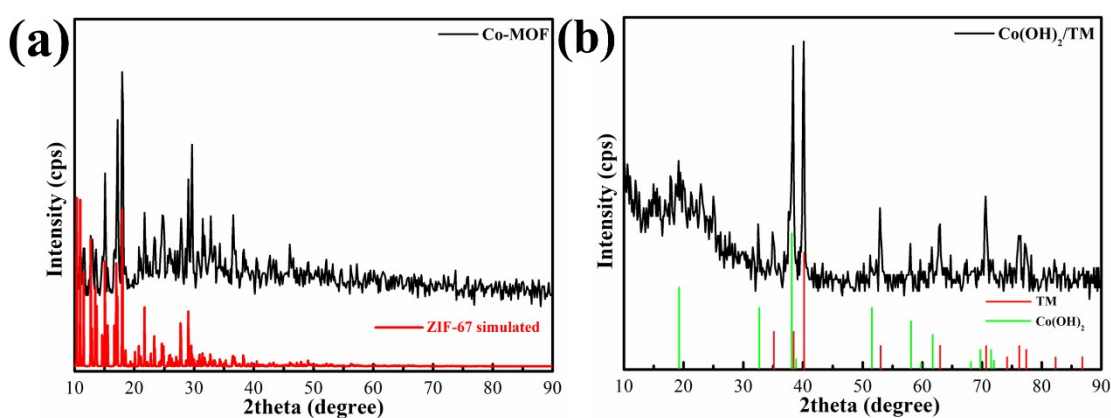

Fig. S1 XRD patterns of Co-MOF (a) and  $\text{Co(OH)}_2/\text{TM}$  (b)

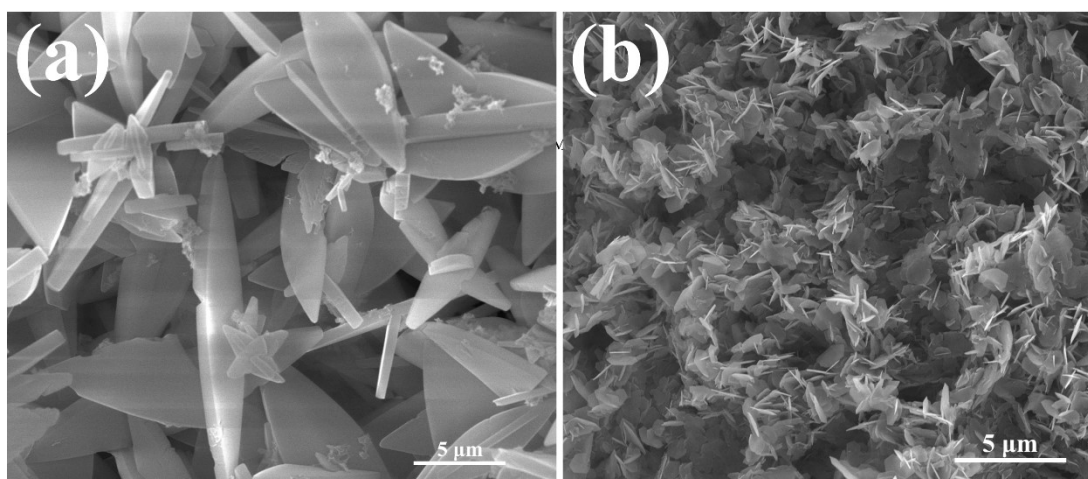

Fig. S2 SEM images of Co-MOF/TM (a) and  $\text{Co(OH)}_2/\text{TM}$  (b)

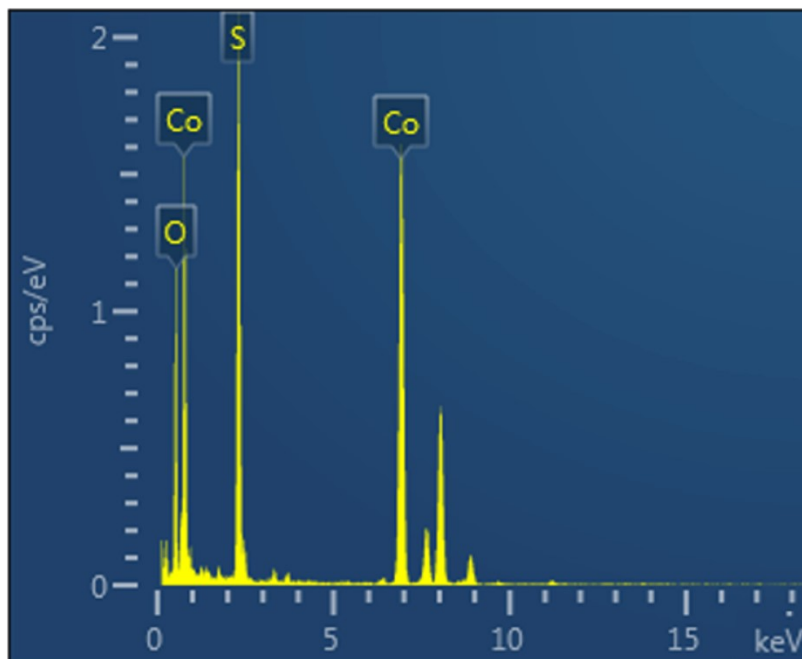

Fig. S3 TEM-EDS spectrum of f  $\text{Co}_3\text{S}_4/\text{TM}$

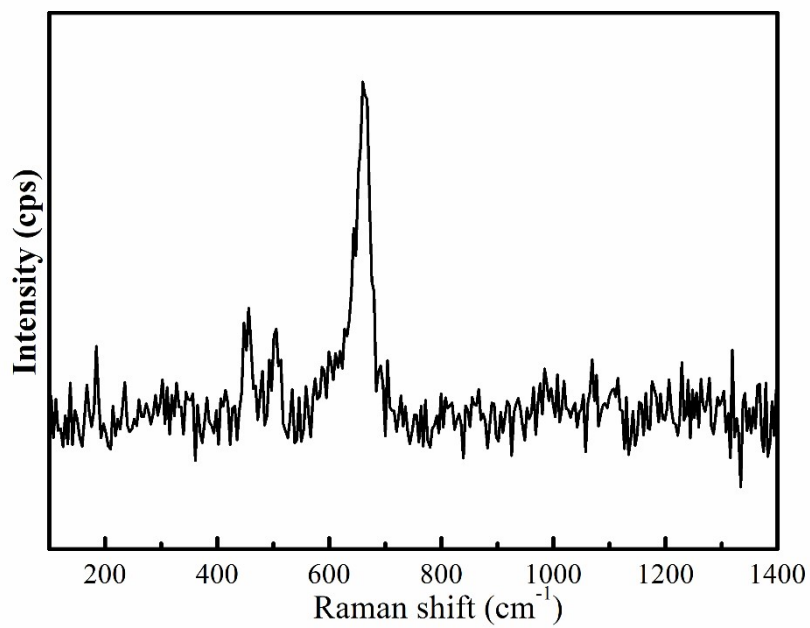

Fig. S4 Raman spectrum of  $\text{Co}_3\text{S}_4/\text{TM}$

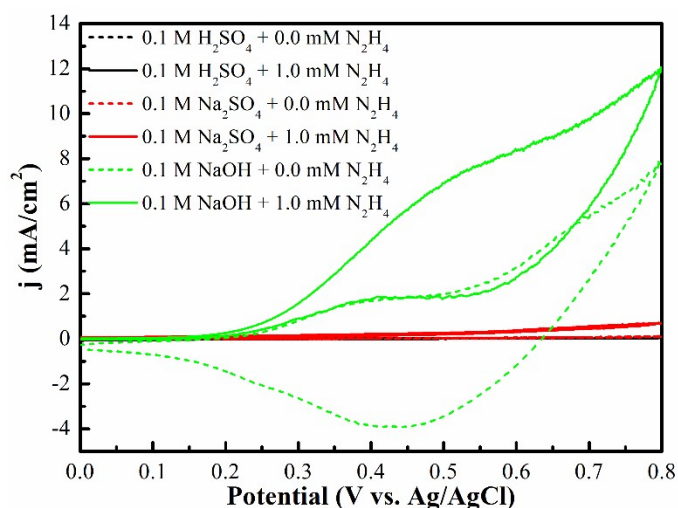

Fig. S5 CV curves of  $\text{Co}_3\text{S}_4/\text{TM}$  in different electrolytes with and without 1.0 mM hydrazine

Table S1. Hydrazine sensing performance comparison of  $\text{Co}_3\text{S}_4/\text{TM}$  with other sensors.

| Electrode                                 | Linear range (mM) | Sensitivity ( $\mu\text{A mM}^{-1} \text{cm}^{-2}$ ) | LOD ( $\mu\text{M}$ ) | Refs.     |
|-------------------------------------------|-------------------|------------------------------------------------------|-----------------------|-----------|
| $\text{Co}_3\text{S}_4/\text{TM}$         | 0.005–2.0         | 2956                                                 | 0.70                  | This work |
| Au@porous P-MWCNT/rGO/GCE                 | 3–55              | 98                                                   | 0.31                  | 1         |
| CoOOH nanosheet /GCE                      | 0–1.2             | 155                                                  | 20                    | 2         |
| $\text{Co}_3\text{O}_4$ NWs               | 0.02–0.7          | 408.6                                                | 0.5                   | 3         |
| $\text{CeO}_2$ @organic dye               | 0.001–3.22        | 484.86                                               | 0.057                 | 4         |
| Cobalt hydroxide                          | 0.02–5.0          | 1.8                                                  | 1.6                   | 5         |
| CoS2-ionic liquid-functionalized graphene | 0.005–0.4         | 106.9                                                | 0.4                   | 6         |
| Pt-Pd/ERGO/GCE                            | 0.007–5.5         | 254.8                                                | 1.7                   | 7         |
| CuS/rGO                                   | 0.001–1.0         | 113.7                                                | 0.3                   | 8         |
| $\text{Fe}_2\text{O}_3$ /graphite         | 0.01–1.0          | 157.5                                                | 1.2                   | 9         |
| $\text{TiO}_2$ @PANI@Au                   | 0.0009–1.2        | 341.2                                                | 0.15                  | 10        |

## References

1. X. Zhang and J. Zheng, *Microchimica Acta*, 2020, **187**, 89.
2. K. K. Lee, P. Y. Loh, C. H. Sow and W. S. Chin, *Biosensors and Bioelectronics*, 2013, **39**, 255-260.
3. J. Zhang, W. Gao, M. Dou, F. Wang, J. Liu, Z. Li and J. Ji, *Analyst*, 2015, **140**,

1686-1692.

4. N. S. K. Gowthaman, H. Ngee Lim, V. Balakumar and S. Shankar, *Ultrasonics Sonochemistry*, 2020, **61**, 104828.
5. M. Hasanzadeh, G. Karim-Nezhad, N. Shadjou, B. Khalilzadeh, L. Saghatforoush, S. Ershad and I. Kazeman, *Chinese Journal of Chemistry* 2009, **27**, 638-644.
6. F. Luan, S. Zhang, D. Chen, K. Zheng and X. Zhuang, *Talanta*, 2018, **182**, 529-535.
7. S. Ghasemi, S. R. Hosseini, F. Hasanpoor and S. Nabipour, *Microchimica Acta*, 2019, **186**, 601.
8. Y. J. Yang, W. Li and X. Wu, *Electrochimica Acta*, 2014, **123**, 260-267.
9. B. Šljukić, C. E. Banks, A. Crossley and R. G. Compton, *Electroanalysis*, 2006, **18**, 1757-1762.
10. E. Saeb and K. Asadpour-Zeynali, *Microchemical Journal*, 2021, **160**, 105603.
